# Supplementary material for: A narrow-band ultra-bright green phosphor for LED-based applications
Source: Royal Society of Chemistry journal article supplement (doi:10.1039/c9dt04092g), 2020-01-01
Supplement: c9dt04092g1.pdf [file c9dt04092g1.pdf]

## Electronic Supplementary Information

### **A Narrow-band Ultra-bright Green Phosphor for LED-based Applications**

Quan Dong,<sup>a,b</sup> Jiaojie Yang,<sup>a,b</sup> Jun Cui,<sup>a,b</sup> Fanfan Xu,<sup>a,b</sup> Fengli Yang,<sup>\*,a,b</sup>  
Jiaqing Peng,<sup>a,b,\*</sup> Fu Du,<sup>a,b</sup> Xinyu Ye,<sup>a,b,c</sup> Shaohua Yang<sup>a</sup>

*<sup>a</sup>School of Metallurgical Engineering, Jiangxi University of Science and Technology,  
Ganzhou 341000, P.R.China*

*<sup>b</sup>Key Laboratory of Rare Earth Luminescence Materials and Devices of Jiangxi  
Province, Ganzhou 341000, P.R.China*

*<sup>c</sup>National Engineering Research Center for Ionic Rare Earth, Ganzhou 341000,  
P.R.China*

\*Corresponding author

Email: sophieyfl@163.com (Fengli Yang), jiaqpeng@hotmail.com (Jiaqing Peng).

**Table S1.** Rietveld refinement data of the crystal structure of SMBO: 0.05Ce<sup>3+</sup>.

| Atom           | Wyckoff position | <i>x</i>    | <i>y</i>   | <i>z</i>   | <i>Occ.</i> | <i>U</i> <sub>iso</sub> (Å <sup>2</sup> ) |
|----------------|------------------|-------------|------------|------------|-------------|-------------------------------------------|
| Sr             | 4i               | 0.28789(3)  | 0          | 0.81269(1) | 0.95        | 0.0171(5)                                 |
| Mg             | 2d               | 0.5         | 0          | 0.5        | 1           | 0.0256 (7)                                |
| B              | 4i               | 0.05238(5)  | 0          | 0.24429(4) | 1           | 0.0125(6)                                 |
| O <sub>1</sub> | 8j               | -0.02582(9) | -0.2400(6) | 0.22773(6) | 1           | 0.0198(6)                                 |
| O <sub>2</sub> | 4i               | 0.22108(7)  | 0          | 0.30943(5) | 1           | 0.0556(4)                                 |
| Ce             | 4i               | 0.28789(3)  | 0          | 0.81269(1) | 0.05        | 0.0181(6)                                 |

**Table S2.** Rietveld refinement data of the crystal structure of SMBO: 0.05Ce<sup>3+</sup>, 0.05Tb<sup>3+</sup>.

| Atom           | Wyckoff position | <i>x</i>    | <i>y</i>    | <i>z</i>   | <i>Occ.</i> | <i>U</i> <sub>iso</sub> (Å <sup>2</sup> ) |
|----------------|------------------|-------------|-------------|------------|-------------|-------------------------------------------|
| Sr             | 4i               | 0.289500    | 0           | 0.817000   | 0.9         | 0.01                                      |
| Mg             | 2d               | 0.5         | 0           | 0.5        | 1           | 0.0229(7)                                 |
| B              | 4i               | 0.04755(7)  | 0           | 0.23873(1) | 1           | 0.0149(1)                                 |
| O <sub>1</sub> | 8j               | -0.02759(0) | -0.23842(7) | 0.23148(4) | 1           | 0.0111(1)                                 |
| O <sub>2</sub> | 4i               | 0.22502(1)  | 0           | 0.31181(1) | 1           | 0.0398(1)                                 |
| Ce             | 4i               | 0.289500    | 0           | 0.817000   | 0.05        | 0.01                                      |
| Tb             | 4i               | 0.289500    | 0           | 0.817000   | 0.05        | 0.01                                      |

**Table 3.** CIE Chromaticity Coordinates for SMBO: 0.05Ce<sup>3+</sup>, yTb<sup>3+</sup> samples

| Sample number | Tb <sup>3+</sup> concentration y | CIE coordinates (x, y) |
|---------------|----------------------------------|------------------------|
| 1             | 0                                | (0.1621, 0.0404)       |
| 2             | 0.01                             | (0.2017, 0.2716)       |
| 3             | 0.03                             | (0.2190, 0.3725)       |
| 4             | 0.05                             | (0.2268, 0.4136)       |
| 5             | 0.07                             | (0.2240, 0.4061)       |
| 6             | 0.10                             | (0.2151, 0.3683)       |

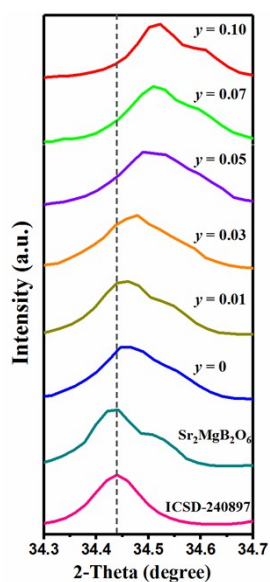

**Fig. S1.** Magnified XRD patterns of SMBO and SMBO:0.05Ce<sup>3+</sup>, yTb<sup>3+</sup> (y = 0 – 0.10) .

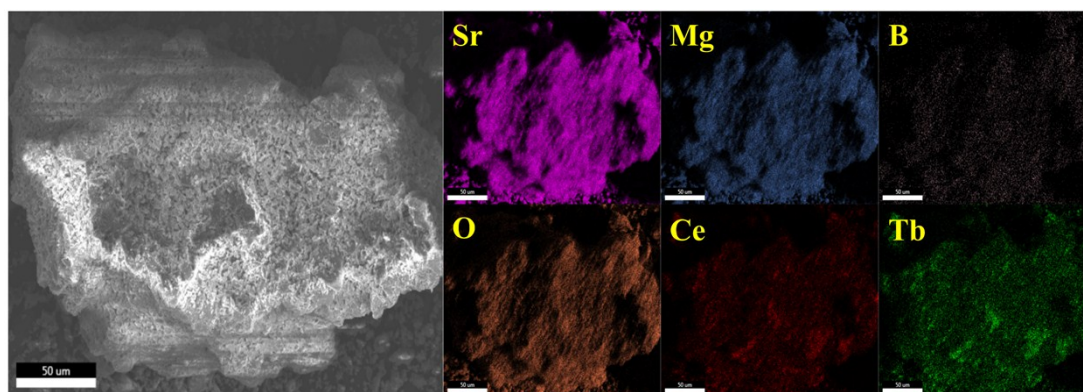

**Fig. S2.** Elements mapping of SMBO: 0.05Ce<sup>3+</sup>, 0.05Tb<sup>3+</sup>.

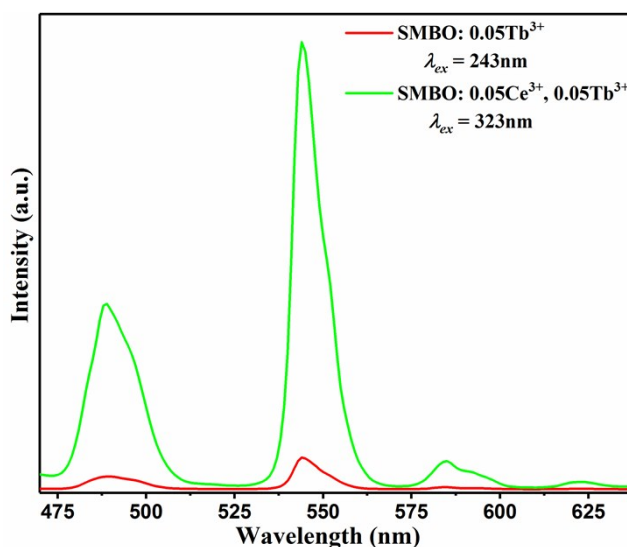

**Fig. S3.** Comparison of Tb<sup>3+</sup> emission intensity with and without 0.05Ce<sup>3+</sup>.

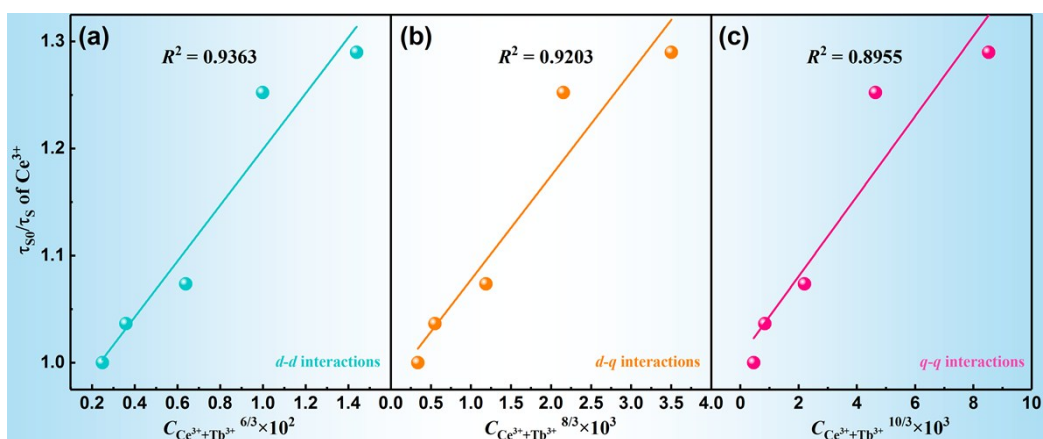

**Fig. S4.** Dependence of  $\tau_{so} / \tau_s$  of Ce<sup>3+</sup> in SMBO:0.05Ce<sup>3+</sup>, yTb<sup>3+</sup> on Tb<sup>3+</sup> concentration

(a)  $C^{6/3}$ , (b)  $C^{8/3}$ , and (c)  $C^{10/3}$ .

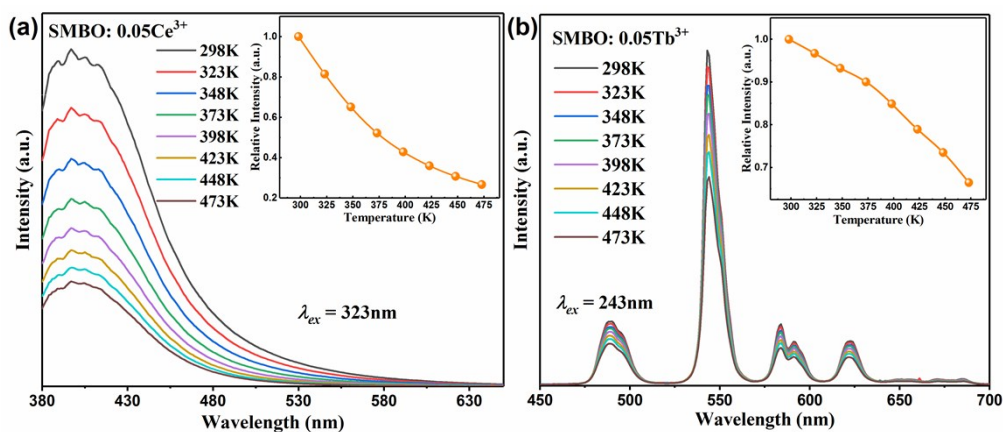

**Fig. S5.** Thermal quenching behavior of emission spectra for (a) SMBO: 0.05Ce<sup>3+</sup>, and

(b) SMBO: 0.05Tb<sup>3+</sup>. The insets represent the relative integrated intensity.

Since the test wavelength of the thermal quenching analysis equipment can only start from 380 nm, the temperature-dependent emission spectrum of SMBO: 0.05Ce<sup>3+</sup> before 380 nm cannot be obtained, but this does not affect the overall trend of change.

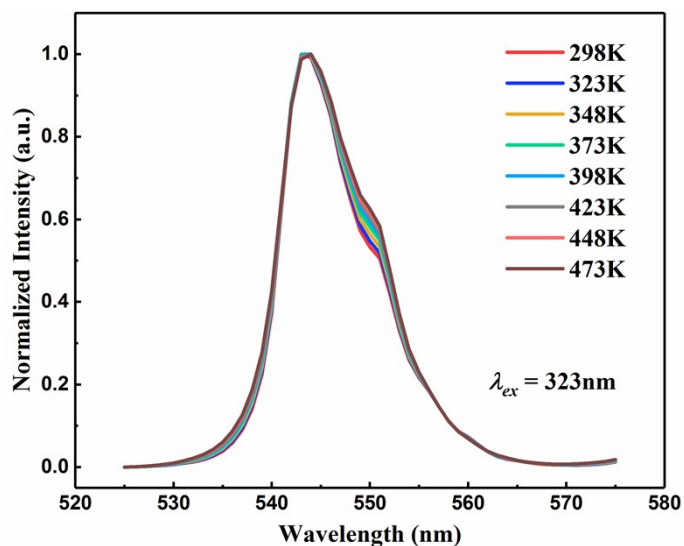

**Fig. S6.** The normalized emission spectra of SMBO: 0.05Ce<sup>3+</sup>, 0.05Tb<sup>3+</sup> sample at 544 nm under different temperature.

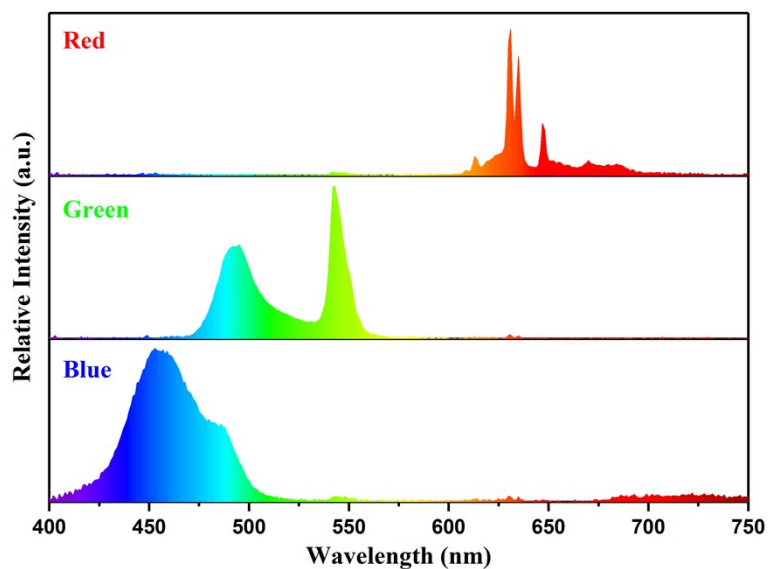

**Fig. S7.** Spectra of the output light of the as-fabricated white LED after passing through the corresponding RGB CFs.

Obviously, the blue light from Tb<sup>3+</sup> and part of BAM: Eu<sup>2+</sup> cannot be effectively

filtered due to the limitations of the current traditional green CF. If an ideal green CF is developed to completely eliminated crosstalk, the green emission will be as narrow as that of the LED chip.
